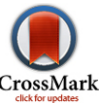

## Correction

# Correction: Non-Linear Analysis Indicates Chaotic Dynamics and Reduced Resilience in Model-Based Daphnia Populations Exposed to Environmental Stress

The *PLOS ONE* Staff

## Notice of Republication

This article was republished on August 7, 2014, to replace incorrectly changed character in the byline, citation, and references. The publisher apologizes for the errors. Please download this article again to view the correct version. The originally published, uncorrected article and the republished, corrected article are provided here for reference.

## Supporting Information

**File S1.** Originally published, uncorrected article.  
(PDF)

**File S2.** Republished, corrected article.  
(PDF)

## Reference

1. Ottermanns R, Szonn K, Preuß TG, Roß-Nickoll M (2014) Non-Linear Analysis Indicates Chaotic Dynamics and Reduced Resilience in Model-Based Daphnia Populations Exposed to Environmental Stress. *PLoS ONE* 9(5): e96270. doi:10.1371/journal.pone.0096270

**Citation:** The *PLOS ONE* Staff (2014) Correction: Non-Linear Analysis Indicates Chaotic Dynamics and Reduced Resilience in Model-Based Daphnia Populations Exposed to Environmental Stress. *PLoS ONE* 9(8): e107090. doi:10.1371/journal.pone.0107090

**Published** August 25, 2014

**Copyright:** © 2014 The *PLOS ONE* Staff. This is an open-access article distributed under the terms of the Creative Commons Attribution License, which permits unrestricted use, distribution, and reproduction in any medium, provided the original author and source are credited.
